# Supplementary material
Source: PubMed Central journal article supplement (PMC2666574)
Supplement: M807228200_1.pdf [file M807228200_1.pdf]

*Supplementary Fig. A*, lipid raft disruption does not change the amount of cell surface exposed channel. Cell surface biotinylation experiments were performed on control and MCD treated CR#1 cells. No change in the amount of biotinylated TRPM8 channel was found. *B*, inhibition of lipid raft mediated endocytosis by the protein-kinase inhibitor genistein has no effect on TRPM8 activity. Bar histogram of TRPM8 menthol-evoked responses in control and genistein-treated cells (100  $\mu$ M, 10min).

**A**

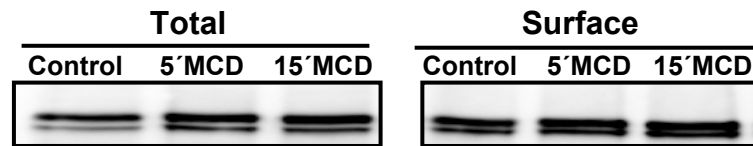

**B**

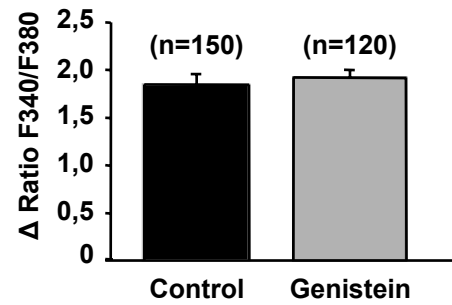

**Supplementary Figure 1**
